# Supplementary material for: Indoleamine 2,3-dioxygenase activity and clinical outcome following induction chemotherapy and concurrent chemoradiation in Stage III non-small cell lung cancer
Source: PubMed Central journal article supplement — Oncoimmunology. 2013 Mar 1;2(3):e23428. doi: 10.4161/onci.23428 (PMC3661168; doi:10.4161/onci.23428), 2013-03-01
Supplement: onci-2-e23428-s01.pdf [file onci-2-e23428-s01.pdf]

## **Supplemental Material to:**

**Scott Antonia, Timothy Garrett, George Simon, Gerold Bepler, Hatem Soliman and Ben Creelan**

**Indoleamine 2,3-dioxygenase activity and clinical outcome following induction chemotherapy and concurrent chemoradiation in stage III non-small cell lung cancer**

**Oncoimmunology 2013; 2(3)**

**<http://dx.doi.org/10.4161/onci.23428>**

**[http://www.landesbioscience.com/journals/oncoimmunology/  
article/23428/](http://www.landesbioscience.com/journals/oncoimmunology/article/23428/)**

| <b>Supplemental Table.</b> Intra- and inter-assay imprecision of the HPLC–MS/MS method. |                           |                                   |               |                |                             |                  |                                    |               |      |
|-----------------------------------------------------------------------------------------|---------------------------|-----------------------------------|---------------|----------------|-----------------------------|------------------|------------------------------------|---------------|------|
| <b>Analyte</b>                                                                          | <b>Concentration (µM)</b> | <b>Intraassay variation (n=8)</b> |               |                | <b>Day-to-day variation</b> |                  | <b>Population variation (n=24)</b> |               |      |
|                                                                                         |                           | <b>SD (µM)</b>                    | <b>CV (%)</b> | <b>SD (µM)</b> | <b>CV (%)</b>               | <b>Mean (µM)</b> | <b>SD (µM)</b>                     | <b>CV (%)</b> |      |
| Kynurenine                                                                              | Low                       | 0.24                              | 0.006         | 2.3            | 0.008                       | 3.4              | 1.16                               | 0.76          | 65.5 |
|                                                                                         | Med                       | 2.40                              | 0.064         | 2.6            | 0.060                       | 2.5              |                                    |               |      |
|                                                                                         | High                      | 9.61                              | 0.085         | 0.9            | 0.086                       | 0.9              |                                    |               |      |
| Tryptophan                                                                              | Low                       | 2.45                              | 0.022         | 0.9            | 0.063                       | 2.6              | 41.0                               | 7.44          | 18.1 |
|                                                                                         | Med                       | 9.79                              | 0.463         | 0.5            | 0.215                       | 2.2              |                                    |               |      |
|                                                                                         | High                      | 24.5                              | 0.647         | 2.5            | 0.147                       | 0.6              |                                    |               |      |

**Supplemental Table.** Intra- and inter-assay imprecision of the HPLC–MS/MS method. SD: Standard deviation, CV: Coefficient of variation.
